# Supplementary material
Source: publisher figshare collection journal article supplement (https://acs.figshare.com/ndownloader/files/4045705)
Supplement: Supplementary file 1 [file 4045705]

# **Supporting information for:**

## **Freezing and Melting of Salt Hydrates Next to Solid Surfaces Probed by Infrared-Visible Sum Frequency Generation Spectroscopy**

Emmanuel Anim-Danso, Yu Zhang, and Ali Dhinojwala\*

*Department of Polymer Science, The University of Akron, Akron, Ohio 44325-3909, USA*

E-mail: ali4@uakron.edu

### **Cleaning Procedure**

The sapphire prisms were sonicated for 1 hr in acetone, methanol, and deionized water. This was followed by sonication for 30 min in 10–15 mM HNO<sub>3</sub> and then rinsing thoroughly with deionized water. This cleaning method has been used to remove surface organic residues in previous studies and has been shown to give consistent results.<sup>S1–S4</sup> The stainless steel components of the sample cell were also cleaned by the same method. The sapphire prisms and the water cell were blow-dried using dry nitrogen gas followed by heating in an oven at 120 °C.

### **Experimental Chamber and Cell for Cooling and Heating**

Water condensation is a major issue when cooling the SFG sample cell below 0°C, and thus, we designed a sample cell with a vacuum chamber as shown in Figure S1. The inside chamber containing the water was sealed to prevent any loss of water due to the vacuum. The temperature stage was purchased from Instec Inc. and modified in-house to hold the sapphire

---

\*To whom correspondence should be addressed

prisms. A steel dome was designed with  $\text{CaF}_2$  window to introduce the visible and IR beams and  $\text{SiO}_2$  window to collect the output SFG beam. The sample cell was designed with the flexibility to change the orientation of the windows to maintain the normal incidence of the input and output beams. A vacuum pressure of 8 torr was used to prevent water condensation and to maintain temperature uniformity inside the sample chamber.

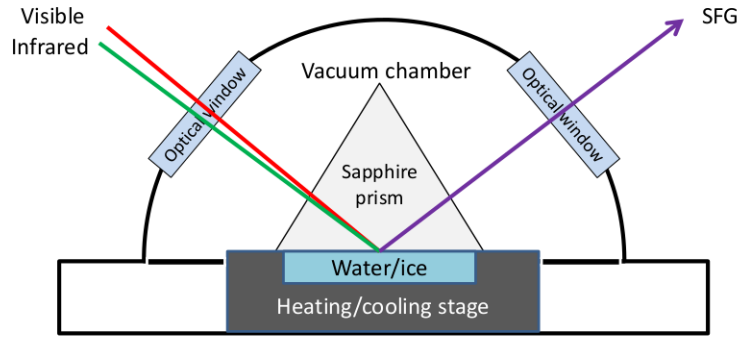

Figure S1: Diagram of the temperature stage and the sample geometry for SFG measurements. The water is sealed from one side by a sapphire prism while the other side is in contact with a heating or cooling stage purchased from Instec Inc. The top part of the temperature cell was machined to hold  $\text{CaF}_2$  and  $\text{SiO}_2$  optical windows for the input and the output of the laser beams. The cell was held under vacuum to prevent water condensation on the sapphire prisms and to maintain the temperature uniformity.

### SFG System

The SFG experiments were conducted using a picosecond Spectra Physics laser system with tunable IR beam –  $2000\text{--}3800\text{ cm}^{-1}$ , 1 ps pulse width, 1 kHz repetition rate and a diameter of  $100\text{--}200\text{ }\mu\text{m}$  and a visible beam of 800 nm in wavelength, with a 1 ps pulse width, 1 kHz repetition rate, and a diameter of 1 mm. These two beams were overlapped

spatially and temporally on the sample. SFG signal is significantly enhanced when the IR overlaps with the resonant frequencies of the molecule being studied. A motorized, computer-controlled delay stage was used to ensure that the temporal delay was maintained while scanning IR frequencies from 2700 to 3800  $\text{cm}^{-1}$ . The experiments were performed using sapphire prisms in total internal reflection geometry. This geometry provides an additional enhancement in the SFG signal if the incident beams are close to the critical angle.<sup>S5</sup> A model to calculate the SSP intensity as a function of incident angles in an internal reflection geometry has been provided in previous publication.<sup>S6</sup> A photomultiplier tube connected to a 0.5 m spectrometer in length was used to collect the SFG signals. All water spectra were collected at an IR incidence of  $16^\circ$  with respect to the face of the sapphire prism ( $60^\circ$  angle prism). The incident angle of the visible laser beam was  $\sim 1.5^\circ$  lower than the incident angles for the tunable IR laser. The polarization combinations reported in this work are SSP (s-polarized SFG output, s-polarized visible input and p-polarized IR input) and PPP (p-polarized SFG output, p-polarized visible input and p-polarized IR input). The SSP and PPP polarizations provide complementary information and could be useful in interpreting the orientation of molecules. We have used a Lorentzian fitting function to fit our data (Equation 1).<sup>S1</sup> The fitting model assumes that the local field factors are not affected by the dispersion of refractive index over the scan region from 2800-3800  $\text{cm}^{-1}$ . This effect needs to be calculated for accurate interpretation of the fit parameters obtained from this analysis.

$$I_{SFG} \propto |\chi_{NR} + \sum \frac{A_q}{\omega_{IR} - \omega_q - i\Gamma_q}|^2, \quad (1)$$

In equation 1,  $\chi_{NR}$  describes the non-resonant contribution.  $A_q$ ,  $\Gamma_q$ , and  $\omega_q$  are the amplitude, damping constant, phase, and angular frequency of the  $q$ th vibrational resonance, respectively. Figures S2 and S3 shows the results of the fits and the fitting parameters obtained from the fits are provided in Tables S1 and S2.

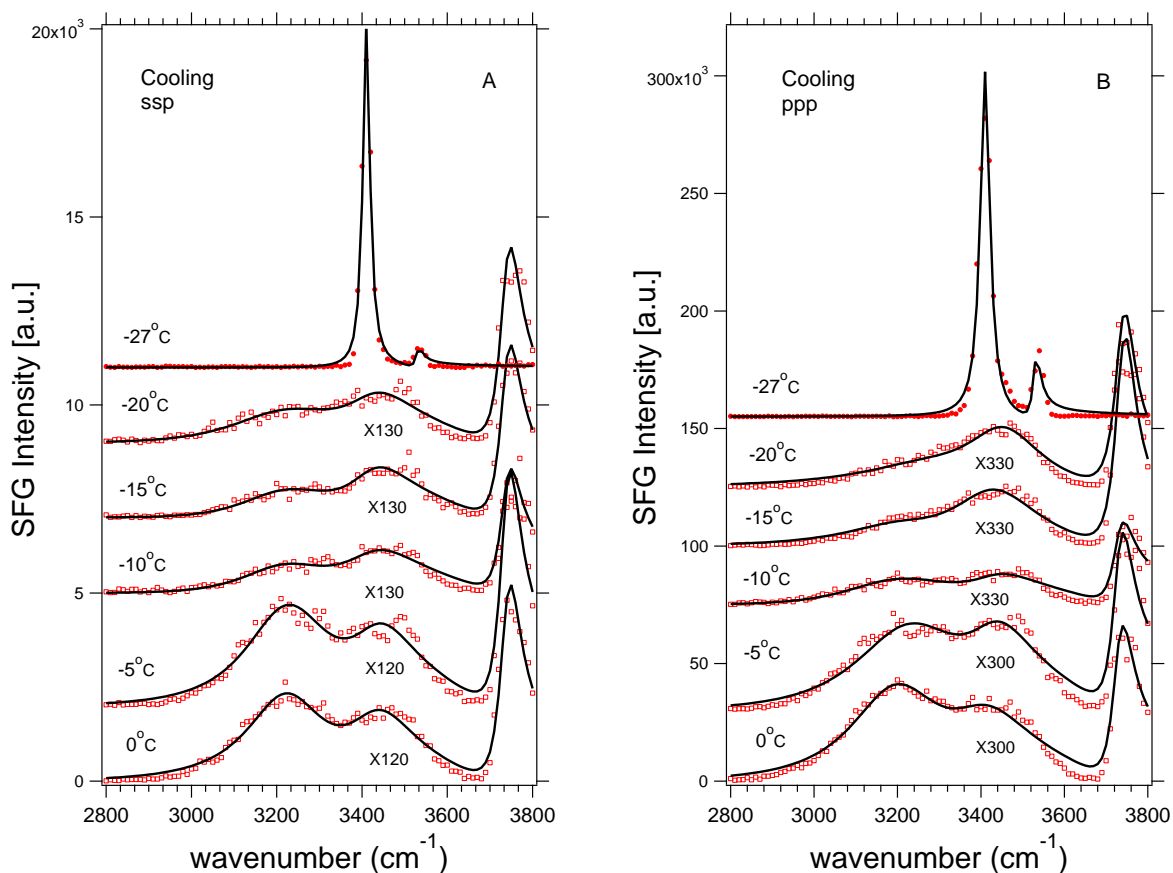

Figure S2: SFG spectra collected in SSP (A) and PPP (B) polarizations during the cooling cycle. The empty squares and filled circles correspond to temperatures where salt solution or NaCl hydrate are in contact with the sapphire substrate, respectively. The solid lines are the fits using the Lorentzian equation and the fitting results are summarized in the supporting information (Tables S1 and S2). The freezing transition temperatures for the hydrate formation are between  $-25^{\circ}\text{C}$  and  $-30^{\circ}\text{C}$ .

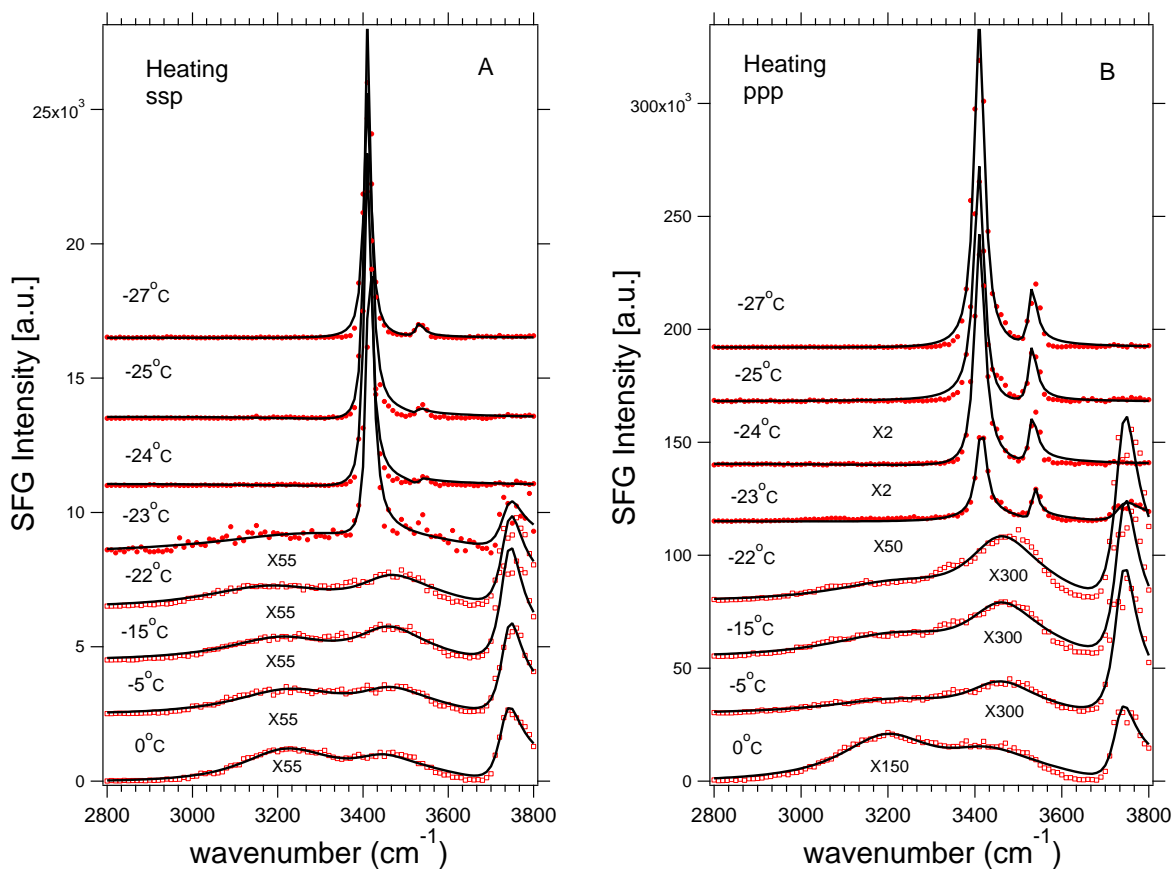

Figure S3: SFG spectra collected in SSP (A) and PPP (B) polarizations during the heating cycle. The empty squares and filled circles correspond to temperature where salt solution or NaCl hydrate are in contact with the sapphire substrate, respectively. The solid lines are the fits using the Lorentzian equation and the fitting results are summarized in the supporting information (Tables S3 and S4). The melting transition temperatures for the hydrate formation is  $-22^\circ\text{C}$ .

Table S1: SFG spectral fitting parameters for NaCl solution and hydrate next to sapphire surface in OH region for SSP polarization in the cooling cycle

| <i>Temperature (°C)</i> | <i>Peak Position (cm<sup>-1</sup>)</i> | <i>Width (cm<sup>-1</sup>)</i> | <i>Amplitude</i> |
|-------------------------|----------------------------------------|--------------------------------|------------------|
| 0                       | 3222                                   | 116                            | 495              |
|                         | 3427                                   | 100                            | 267              |
|                         | 3738                                   | 30                             | 178              |
| -5                      | 3222                                   | 127                            | 597              |
|                         | 3430                                   | 96                             | 242              |
|                         | 3738                                   | 30                             | 192              |
| -10                     | 3235                                   | 135                            | 232              |
|                         | 3434                                   | 125                            | 272              |
|                         | 3738                                   | 30                             | 124              |
| -15                     | 3212                                   | 121                            | 230              |
|                         | 3433                                   | 112                            | 270              |
|                         | 3738                                   | 30                             | 164              |
| -20                     | 3212                                   | 140                            | 274              |
|                         | 3433                                   | 140                            | 305              |
|                         | 3738                                   | 30                             | 175              |
| -27                     | 3410                                   | 10                             | 963              |
|                         | 3530                                   | 11                             | 167              |

Table S2: SFG spectral fitting parameters for NaCl solution and hydrate next to sapphire surface in OH region for PPP polarization in the cooling cycle

| <i>Temperature (°C)</i> | <i>Peak Position (cm<sup>-1</sup>)</i> | <i>Width (cm<sup>-1</sup>)</i> | <i>Amplitude</i> |
|-------------------------|----------------------------------------|--------------------------------|------------------|
| 0                       | 3193                                   | 140                            | 1447             |
|                         | 3400                                   | 120                            | 617              |
|                         | 3730                                   | 30                             | 335              |
| -5                      | 3222                                   | 170                            | 1704             |
|                         | 3429                                   | 100                            | 521              |
|                         | 3730                                   | 30                             | 350              |
| -10                     | 3212                                   | 182                            | 581              |
|                         | 3440                                   | 100                            | 679              |
|                         | 3730                                   | 30                             | 262              |
| -15                     | 3196                                   | 160                            | 654              |
|                         | 3420                                   | 130                            | 800              |
|                         | 3738                                   | 30                             | 388              |
| -20                     | 3278                                   | 200                            | 644              |
|                         | 3450                                   | 110                            | 749              |
|                         | 3738                                   | 30                             | 380              |
| -27                     | 3410                                   | 14                             | 5390             |
|                         | 3530                                   | 11                             | 1369             |

Table S3: SFG spectral fitting parameters for NaCl solution and hydrate next to sapphire surface in OH region for SSP polarization in the heating cycle

| <i>Temperature (°C)</i> | <i>Peak Position (cm<sup>-1</sup>)</i> | <i>Width (cm<sup>-1</sup>)</i> | <i>Amplitude</i> |
|-------------------------|----------------------------------------|--------------------------------|------------------|
| -27                     | 3410                                   | 10                             | 963              |
|                         | 3530                                   | 11                             | 167              |
| -25                     | 3410                                   | 10                             | 1218             |
|                         | 3530                                   | 11                             | 91               |
| -24                     | 3410                                   | 10                             | 1128             |
|                         | 3530                                   | 11                             | 89               |
| -23                     | 3415                                   | 10                             | 115              |
|                         | 3738                                   | 30                             | 114              |
| -22                     | 3217                                   | 200                            | 776              |
|                         | 3455                                   | 100                            | 792              |
|                         | 3738                                   | 30                             | 405              |
| -15                     | 3177                                   | 160                            | 652              |
|                         | 3450                                   | 100                            | 942              |
|                         | 3738                                   | 30                             | 456              |
| -5                      | 3217                                   | 169                            | 606              |
|                         | 3450                                   | 100                            | 655              |
|                         | 3738                                   | 30                             | 373              |
| 0                       | 3209                                   | 143                            | 624              |
|                         | 3428                                   | 90                             | 164              |
|                         | 3732                                   | 31                             | 171              |

Table S4: SFG spectral fitting parameters for NaCl solution and hydrate next to sapphire surface in OH region for PPP polarization in the heating cycle

| <i>Temperature (°C)</i> | <i>Peak Position (cm<sup>-1</sup>)</i> | <i>Width (cm<sup>-1</sup>)</i> | <i>Amplitude</i> |
|-------------------------|----------------------------------------|--------------------------------|------------------|
| -27                     | 3410                                   | 14                             | 5390             |
|                         | 3530                                   | 11                             | 1369             |
| -25                     | 3410                                   | 14                             | 3097             |
|                         | 3530                                   | 11                             | 1041             |
| -24                     | 3410                                   | 10                             | 3179             |
|                         | 3530                                   | 11                             | 833              |
| -23                     | 3415                                   | 14                             | 324              |
|                         | 3534                                   | 8                              | 97               |
|                         | 3738                                   | 30                             | 295              |
| -22                     | 3217                                   | 200                            | 776              |
|                         | 3455                                   | 100                            | 797              |
|                         | 3738                                   | 30                             | 405              |
| -15                     | 3217                                   | 160                            | 652              |
|                         | 3450                                   | 100                            | 942              |
|                         | 3738                                   | 30                             | 456              |
| -5                      | 3217                                   | 200                            | 606              |
|                         | 3450                                   | 100                            | 655              |
|                         | 3738                                   | 30                             | 373              |
| 0                       | 3196                                   | 135                            | 1391             |
|                         | 3410                                   | 130                            | 700              |
|                         | 3732                                   | 30                             | 337              |



## References

- (S1) Zhang, L.; Tian, C.; Waychunas, G. A.; Shen, Y. R. *J. Am. Chem. Soc.* **2008**, *130*, 7686–7694.
- (S2) Braunschweig, B.; Eissner, S.; Daum, W. *J. Phys. Chem. C* **2008**, *112*, 1751–1754.
- (S3) Rabung, T.; Schild, D.; Geckeis, H.; Klenze, R.; Fanghänel, T. *J. Phys. Chem. B* **2004**, *108*, 17160–17165.
- (S4) Lützenkirchen, J.; Zimmermann, R.; Preocanin, T.; Filby, A.; Kupcik, T.; Küttner, D.; Abdelmonem, A.; Schild, D.; Rabung, T.; Plaschke, M.; Brandenstein, F.; Werner, C.; Geckeis, H. *Adv. Colloid Interface Sci.* **2010**, *157*, 61–74.
- (S5) Gautam, K. S.; Schwab, A. D.; Dhinojwala, A.; Zhang, D.; Dougal, S. M.; Yeganeh, M. S. *Phys. Rev. Lett.* **2000**, *85*, 3854–3857.
- (S6) Li, G.; Dhinojwala, A.; Yeganeh, M. S. *J. Phys. Chem. B* **2009**, *113*, 2739–2747.
